# Supplementary material for: A low-cost and high-yield green preparation method of graphdiyne and hydrogen-substituted graphdiyne and their photocatalytic properties
Source: Royal Society of Chemistry journal article supplement (doi:10.1039/d3gc02343e), 2023-01-01
Supplement: d3gc02343e1.pdf [file d3gc02343e1.pdf]

# Supplementary Material

## **A low-cost and high-yield green preparation method of Graphdiyne and Hydrogen-substituted Graphdiyne and its photocatalytic properties**

Zhiliang Jin\*<sup>§</sup>, Youlin Wu<sup>§</sup>

*School of Chemistry and Chemical Engineering, Ningxia Key Laboratory of Solar Chemical  
Conversion Technology, North Minzu University, Yinchuan 750021, P.R.China*

Corresponding author: [zl-jin@nwnu.edu.cn](mailto:zl-jin@nwnu.edu.cn) (Z.L. Jin); <sup>§</sup> Equal contribution

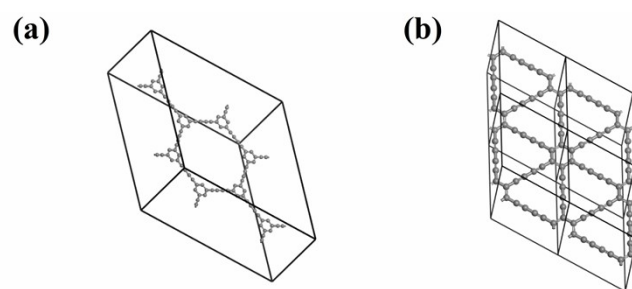

**Fig. S1 (a, b)** the theoretical computational model of H-GDY and GDY.

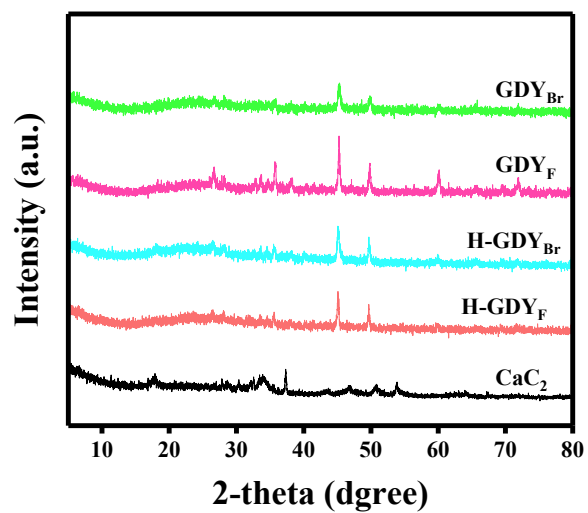

Fig. S2 XRD patterns of CaC<sub>2</sub>, H-GDY<sub>F</sub>, H-GDY<sub>Br</sub>, GDY<sub>F</sub>, and GDY<sub>Br</sub>.

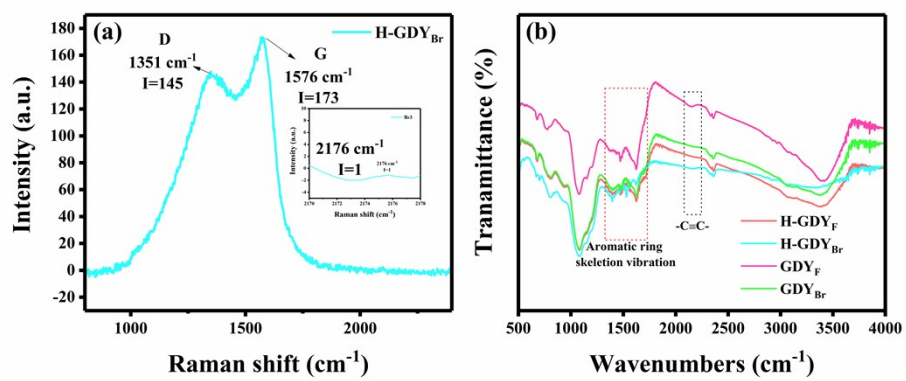

Fig. S3 (a) Raman spectrum of H-GDY<sub>Br</sub>, (b) FT-IR spectrum of all alkynyl carbon materials.

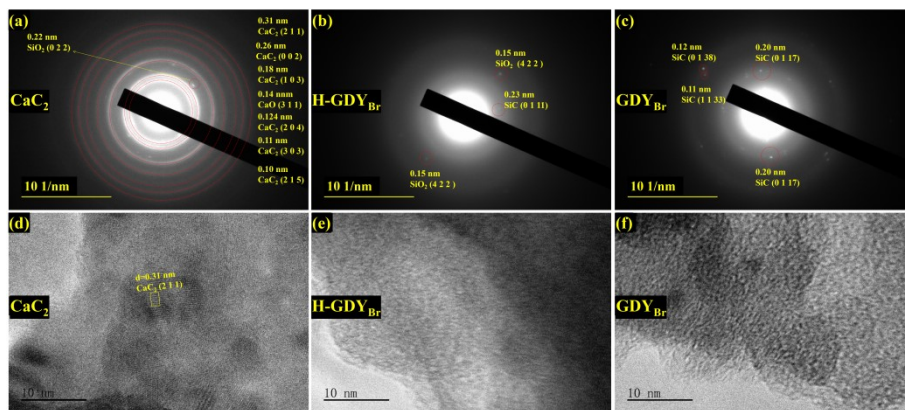

**Fig. S4 (a-f)** Selected area electron diffraction ring and High magnification TEM images of CaC<sub>2</sub>, H-GDY<sub>Br</sub> and GDY<sub>Br</sub>.

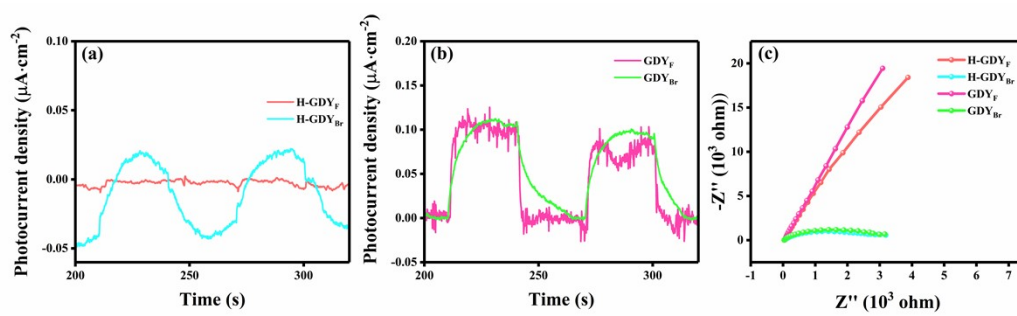

**Fig. S5** (a, b) photocurrent response curves, (c) Nyquist plots of electrochemical impedance spectroscopy.

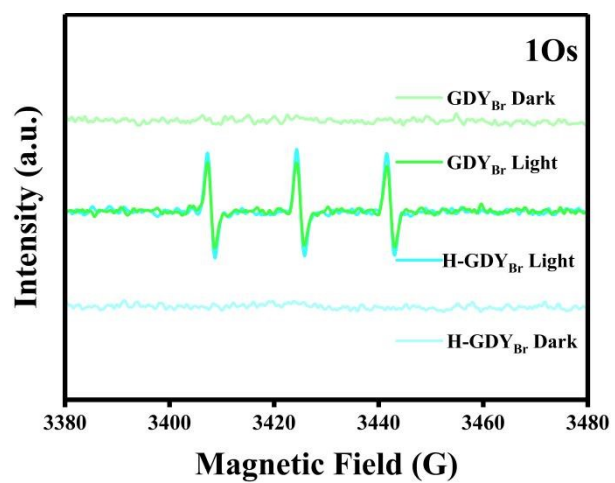

Fig. S6 Electron paramagnetic resonance diagram of 1Os.

**Table S1** The difference and yield of various H-GDY and GDY.

| Samples             | Different halogenated<br>benzene names | Yields (%) |
|---------------------|----------------------------------------|------------|
| GDY <sub>F</sub>    | hexafluorobenzene                      | 42.36 %    |
| GDY <sub>Br</sub>   | hexabromobenzene                       | 48.15%     |
| H-GDY <sub>F</sub>  | 1,3,5-Trifluorobenzene                 | 48.15 %    |
| H-GDY <sub>Br</sub> | 1,3,5-Tribromobenzene                  | 51.16%     |



**Table S2.** The  $S_{\text{BET}}$  and aperture test results data of  $\text{CaC}_2$ , H-GDY<sub>Br</sub> and GDY<sub>Br</sub>.

| Samples                 | $S_{\text{BET}}$ ( $\text{m}^2\text{g}^{-1}$ ) | Pore volume ( $\text{cm}^3\text{g}^{-1}$ ) | Average pore size (nm) |
|-------------------------|------------------------------------------------|--------------------------------------------|------------------------|
| $\text{CaC}_2$          | 4.8786                                         | 0.0146                                     | 9.9221                 |
| H-<br>GDY <sub>Br</sub> | 105.4017                                       | 0.1702                                     | 11.5402                |
| GDY <sub>Br</sub>       | 82.1067                                        | 0.2247                                     | 13.6440                |
